# Supplementary material for: Production of Fusaric Acid by Fusarium spp. in Pure Culture and in Solid Medium Co-Cultures
Source: PubMed Central journal article supplement (PMC6274276; doi:10.3390/molecules21030370), 2016-03-18
Supplement: molecules-21-00370-s001.pdf [file molecules-21-00370-s001.pdf]

# Supplementary Materials: Production of Fusaric Acid by *Fusarium* spp. in Pure Culture and Solid Medium Co-Cultures

Nadine Bohni, Valérie Hofstetter, Katia Gindro, Bart Buyck, Olivier Schumpp, Samuel Bertrand, Michel Monod and Jean-Luc Wolfender

## 1. Supplementary Results

### 1.1. *Fusarium* Voucher Table

**Table S1.** *Fusarium* sampling, GenBank accession numbers for the loci sequenced and GenBank BLAST top score sequence similarity.

| Collection Source | ITS      | GenBank BLAST Top Score Sequence Similarity | <i>RPB2</i> | <i>TEF-1</i> | $\beta$ -Tubulin | Calmodulin |
|-------------------|----------|---------------------------------------------|-------------|--------------|------------------|------------|
| SIN 1             | KU720839 | <i>F. sp.</i> , KT351600, 100%              | KU720899    | KU720951     | KU720743         | KU720799   |
| SIN 2             | KU720840 | <i>F. sp.</i> , KT351600, 100%              | KU720900    | KU720952     | KU720744         | KU720800   |
| SIN 5             | KU720841 | <i>F. sp.</i> , KT351600, 99%               | KU720901    | KU720953     | KU720745         | KU720801   |
| SIN 6             | KU720842 | <i>F. sp.</i> , AF178404, 100%              | KU720902    | KU720993     | KU720746         | KU720828   |
| SIN 8             | KU720843 | <i>F. oxysporum</i> , GU566301, 100%        | KU720903    | KU720954     | KU720747         | KU720802   |
| SIN 9             | KU720844 | <i>F. sp.</i> , KT369822, 100%              | KU720904    | KU720974     | KU720748         | KU720825   |
| SIN 10            | KU720845 | <i>F. sp.</i> , AF178404, 99%               | KU720905    | KU720994     | KU720749         | KU720829   |
| SIN 13            | KU720846 | <i>F. sp.</i> , KT369822, 100%              | KU720906    | NO           | KU720750         | KU720803   |
| SIN 14            | KU720847 | <i>F. sp.</i> , KT369822, 100%              | KU720907    | KU720955     | KU720751         | KU720804   |
| SIN 15            | KU720848 | <i>F. sp.</i> , KT369822, 100%              | KU720908    | KU720956     | KU720752         | KU720805   |
| SIN 16            | KU720849 | <i>F. sp.</i> , KT369822, 100%              | KU720909    | KU720957     | KU720753         | KU720806   |
| SIN 17            | KU720850 | <i>F. sp.</i> , KT369822, 100%              | KU720910    | KU720958     | KU720754         | KU720807   |
| SIN 18            | KU720851 | <i>F. proliferans</i> , KM231816, 100%      | KU720911    | KU720979     | KU720755         | NO         |
| SIN 19            | KU720852 | <i>F. oxysporum</i> , KP267174, 100%        | KU720912    | KU720959     | KU720756         | KU720808   |
| SIN 25            | KU720853 | <i>F. dimerum</i> , EU926260, 100%          | KU720913    | KU720950     | KU720757         | KU720798   |
| SIN 26            | KU720854 | <i>G. moniliformis</i> , JF499683, 100%     | KU720914    | KU720977     | KU720758         | NO         |
| SIN 27            | KU720855 | <i>F. proliferans</i> , KM231816, 100%      | KU720915    | NO           | KU720759         | KU720838   |
| SIN 30            | KU720856 | <i>F. sp.</i> , AF178404, 100%              | KU720916    | NO           | KU720760         | NO         |
| SIN 40            | KU720857 | <i>F. sp.</i> , AF178404, 99%               | KU720917    | NO           | KU720761         | NO         |
| SIN 46            | KU720858 | <i>F. sp.</i> , KT369822, 100%              | KU720918    | KU720960     | KU720762         | KU720809   |
| SIN 48            | KU720859 | <i>F. sp.</i> , KT369822, 100%              | KU720919    | KU720961     | KU720763         | KU720810   |
| SIN 50            | KU720860 | <i>F. sp.</i> , KT369822, 100%              | KU720925    | NO           | KU720764         | KU720818   |
| SIN 52            | KU720861 | <i>F. sp.</i> , KC808235, 100%              | NO          | KU720984     | KU720765         | NO         |
| SIN 53            | KU720862 | <i>F. proliferans</i> , KM231816, 100%      | KU720920    | KU720983     | KU720766         | NO         |
| SIN 54            | KU720863 | <i>F. kerato.</i> , KF255446, 100%          | NO          | KU720985     | KU720767         | KU720835   |
| SIN 55            | KU720864 | <i>F. kerato.</i> , KF255446, 100%          | NO          | KU720986     | KU720768         | KU720836   |
| SIN 56            | KU720865 | <i>F. sp.</i> , KC808235, 100%              | NO          | KU720987     | KU720769         | KU720833   |
| SIN 57            | KU720866 | <i>F. sp.</i> , KT369822, 100%              | KU720926    | KU720969     | KU720770         | KU720819   |
| SIN 58            | KU720867 | <i>F. kerato.</i> , KF255446, 100%          | NO          | KU720988     | KU720771         | KU720837   |
| SIN 59            | KU720868 | <i>F. sp.</i> , EU977213, 100%              | KU720927    | KU720980     | KU720772         | NO         |
| SIN 60            | KU720869 | <i>F. sp.</i> , KT369822, 100%              | KU720928    | NO           | KU720773         | KU720820   |
| SIN 61            | KU720870 | <i>F. sp.</i> , KT369822, 100%              | KU720929    | KU720970     | KU720774         | KU720821   |
| SIN 62            | KU720871 | <i>F. proliferans</i> , KM231816, 100%      | KU720930    | KU720981     | NO               | NO         |
| SIN 65            | KU720872 | <i>F. sp.</i> , GU170639, 100%              | NO          | KU720989     | KU720775         | KU720834   |
| SIN 66            | KU720873 | <i>F. oxysporum</i> , KP267174, 100%        | KU720921    | KU720963     | KU720776         | KU720812   |
| SIN 67            | KU720874 | <i>F. proliferans</i> , KM231816, 100%      | KU720931    | NO           | NO               | NO         |
| SIN 68            | KU720875 | <i>F. sp.</i> , KT369822, 100%              | KU720922    | KU720964     | KU720777         | KU720813   |
| SIN 72            | KU720876 | <i>F. sp.</i> , KT369822, 100%              | KU720932    | KU720971     | KU720778         | KU720822   |
| SIN 73            | KU720877 | <i>F. sp.</i> , KT369822, 100%              | KU720933    | KU720972     | KU720779         | KU720823   |
| SIN 74            | KU720878 | <i>F. sp.</i> , KP091293, 99%               | KU720934    | KU720990     | KU720780         | KU720831   |
| SIN 76            | KU720879 | <i>F. sp.</i> , KP091293, 99%               | KU720935    | KU720991     | KU720781         | KU720832   |
| SIN 78            | KU720880 | <i>F. proliferans</i> , KM231816, 100%      | KU720936    | KU720978     | KU720782         | NO         |
| SIN 82            | KU720881 | <i>F. sp.</i> , KT369822, 100%              | KU720937    | KU720965     | KU720783         | KU720814   |
| SIN 83            | KU720882 | <i>F. sp.</i> , KT369822, 100%              | KU720938    | KU720966     | KU720784         | KU720815   |
| SIN 84            | KU720883 | <i>F. sp.</i> , KP091293, 99%               | KU720939    | KU720995     | KU720785         | NO         |
| SIN 85            | KU720884 | <i>F. proliferans</i> , KM231816, 100%      | KU720940    | KU720982     | KU720786         | NO         |

Table S1. Cont.

| Collection Source | ITS      | GenBank BLAST Top Score Sequence Similarity | RPB2     | TEF-1    | β-Tubulin | Calmodulin |
|-------------------|----------|---------------------------------------------|----------|----------|-----------|------------|
| SIN 87            | KU720885 | <i>F. sp.</i> , KT369822, 100%              | KU720923 | KU720967 | KU720787  | KU720816   |
| SIN 88            | KU720886 | <i>F. sp.</i> , KT369822, 100%              | KU720924 | KU720968 | KU720788  | KU720817   |
| SIN 89            | KU720887 | <i>F. sp.</i> , KP091293, 100%              | KU720941 | KU720996 | KU720789  | KU720830   |
| SIN 90            | KU720888 | <i>F. petroli.</i> , KP132225, 100%         | KU720942 | KU720992 | KU720790  | KU720827   |
| SIN 99            | KU720889 | <i>F. sp.</i> , KT369822, 100%              | KU720943 | KU720973 | KU720791  | KU720824   |
| SIN 101           | KU720890 | <i>F. sp.</i> , KT369822, 100%              | KU720944 | KU720975 | KU720792  | KU720826   |
| SIN 106           | KU720891 | <i>F. sp.</i> , KT369822, 100%              | KU720945 | KU720976 | KU720793  | NO         |
| SIN 107           | KU720892 | <i>F. sp.</i> , KT369822, 99%               | KU720946 | NO       | KU720794  | NO         |
| Myc133            | KU720893 | <i>F. buharicum</i> , U34581, 96%           | KU720948 | KU720949 | KU720795  | KU720797   |
| Myc51             | KU720894 | <i>F. oxysporum</i> , KP267174, 100%        | KU720947 | KU720962 | KU720796  | KU720811   |

Collection source: SIN = Centre Hospitalier Cantonal Vaudois (CHUV, Lausanne Switzerland); Myc = (<http://mycoscope.bcis.ch/>). "NO" indicates missing data. Locus abbreviations: ITS = internal transcribed spacers 1 and 2 plus 5.8S rDNA; RPB2 = RNA polymerase II second largest subunit; TEF-1 = translation elongation factor 1-alpha. Species name abbreviations: *F. prolif.* = *F. proliferatum*; *F. kerato.* = *F. keratoplasticum*; *F. petro.* = *F. petroliophilum*.

### 1.2. Automated Dereplication of Pure Culture and Co-Culture Extracts

In addition to the annotation of induced compounds as described in the main text, the high-resolution chromatograms from UHPLC-TOFMS were dereplicated for known fungal metabolites reported in the Dictionary of Natural Products (DNP, version 22:1, CRC Press, Taylor & Francis, Abingdon, UK) based on an automated procedure using MZmine 2. As already apparent from the visual representation of the UHPLC-TOFMS chromatograms (Figure 2), only a handful of compounds were detected in positive ionization (PI) mode for all three extracts. The peak lists generated in MZmine 2 were cross-checked with *Fusarium* and *Acremonium* (synonym of *Sarocladium*) metabolites found in DNP. Extending the search to all microbial metabolites reported in DNP provides putative annotation for almost all detected peaks. As false positive rate can be very high, chemotaxonomic information was included in the dereplication procedure. In this way, a few peaks (Tables S2 and S3) could be putatively assigned based on the high mass accuracy and the spectral accuracy of the MS (level 3 according to the Metabolomics Standards Initiative (MSI) [1]).

In the pure culture extract of *S. cf. strictum*, the compounds ilicicolin C (7), acremofuranone A (6) and B (5) were annotated in the PI UHPLC-TOFMS profile, whereas ilicicolin C (7), antibiotic LL-Z 1272ε (8), acremofuranone A (5) and B (6) could be putatively assigned in negative ionization (NI) UHPLC-TOFMS profile. Similarly, the compound HA 23 (1) was identified in the PI analysis of the pure culture extract of *F. cf. oxysporum*. The three *de novo* induced compounds detected in the co-culture extract could be putatively assigned to fusarinolic acid (2), dehydrofusaric acid (3) and fusaric acid (4). The structure of all these dereplicated compounds are shown in Supplementary Figure S1. Ilicicolin C and antibiotic LL-Z 1272ε are listed in DNP as *Fusarium* metabolites but both compounds were recently isolated from a sponge-derived *Acremonium* sp. as well as from fungi of other genera [2-4].

The extracted ion traces corresponding to acremofuranone A and ilicicolin C evidenced the presence of various isomers in the *S. cf. strictum* pure culture extract. A search in DNP for the molecular formula of acremofuranone A (C<sub>23</sub>H<sub>29</sub>O<sub>5</sub>Cl) returned three additional fungal metabolites (8'-hydroxyascochlorin [CRC code: OFL20, CAS: n/a], ascofuranone [CRC code: CKR68, CAS: 38462-04-3], chaetomugilin K [CRC code: PYM46, CAS: 1187848-03-8]). For the molecular formula of ilicicolin C (C<sub>23</sub>H<sub>31</sub>O<sub>4</sub>Cl), DNP search returned two additional fungal metabolites (ilicicolinic acid A [CRC code: MWZ28, CAS: 152607-06-2], LL-Z 1272α epoxide [CRC code: PZN75, CAS: 1202381-02-9]). The detected compounds have not been automatically assigned to these other compounds as their biological source was unrelated to *Acremonium* spp. but these, or derivatives thereof, have been isolated from an *Acremonium* sp. [2]. Confident identification of the detected compounds would have necessitated comparison with authentic standards or subsequent isolation and NMR analysis (level 1 based on MSI). In this study, the interest was mainly related to the induced compounds and the targeted isolation for confirmatory analysis by NMR was performed only on the co-culture extract.

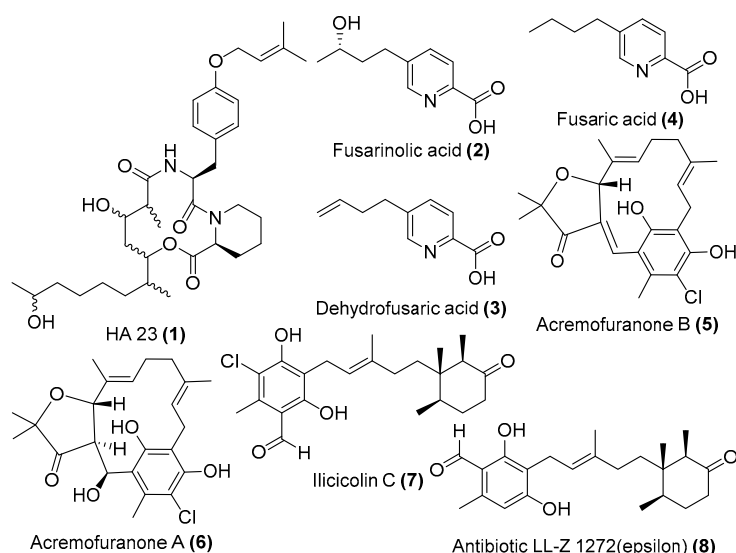

**Figure S1.** Structures of dereplicated molecules. The numbers correspond to its molecular formula and its occurrence in the different chromatograms is given in Figure 3 and Tables S2 and S3.

**Table S2.** List of detected compounds in positive ionization (PI) UHPLC-TOFMS metabolite profiling in the extracts of *F. cf. oxysporum* and *S. cf. strictum* pure cultures and the co-culture that were putatively assigned to known fungal metabolites based on the Dictionary of Natural Products (version 22:1, CRC Press, Taylor & Francis, Abingdon, UK). The derived molecular formulae are consecutively numbered and their position is shown in the chromatogram (Figure 3).

| PI UHPLC-TOFMS Metabolite Profiling  |                 |                      |                                                                   |                 |                |                       |                     |
|--------------------------------------|-----------------|----------------------|-------------------------------------------------------------------|-----------------|----------------|-----------------------|---------------------|
|                                      | <i>m/z</i> (Da) | Retention time (min) | Molecular Formula                                                 | Exact Mass (Da) | $\Delta$ (ppm) | CRC Code CAS          | Putative Annotation |
| <i>F. cf. oxysporum</i> pure culture | 601.4001        | 24.2                 | C <sub>34</sub> H <sub>52</sub> N <sub>2</sub> O <sub>7</sub> (1) | 601.3853        | 24.6           | LQX93<br>n/a          | HA 23               |
|                                      | 196.0990        | 1.5                  | C <sub>10</sub> H <sub>13</sub> NO <sub>3</sub> (2)               | 196.0974        | 8.2            | FTS52<br>26108-30-5   | Fusarinolic acid    |
| co-culture                           | 178.0880        | 3.0                  | C <sub>10</sub> H <sub>11</sub> NO <sub>2</sub> (3)               | 178.0868        | 6.7            | FVX97<br>3626-76-4    | Dehydrofusaric acid |
|                                      | 180.1030        | 3.9                  | C <sub>10</sub> H <sub>13</sub> NO <sub>2</sub> (4)               | 180.1025        | 2.8            | FTS47<br>536-69-6     | Fusaric acid        |
| <i>S. cf. strictum</i> pure culture  | 403.1652        | 20.4                 | C <sub>23</sub> H <sub>27</sub> O <sub>4</sub> Cl (5)             | 403.1676        | 6.0            | PVP88<br>1114927-91-1 | Acremofuranone B    |
|                                      | 421.1785        | 21.2                 | C <sub>23</sub> H <sub>29</sub> O <sub>5</sub> Cl (6)             | 421.1782        | 0.7            | PVV28<br>1114927-89-7 | Acremofuranone A    |
|                                      | 407.1989        | 22.3                 | C <sub>23</sub> H <sub>31</sub> O <sub>4</sub> Cl (7)             | 407.1989        | 0.0            | HJB60<br>1202381-02-9 | Illicicolin C       |

**Table S3.** List of detected compounds in negative ionization (NI) UHPLC-TOFMS metabolite profiling in the extracts of *F. cf. oxysporum* and *S. cf. strictum* pure cultures and the co-culture that were putatively assigned to known fungal metabolites based on the Dictionary of Natural Products (version 22:1, Taylor & Francis, Abingdon, UK). The derived molecular formulae are consecutively numbered and their position is shown in the chromatogram (Figure 2).

| NI UHPLC-TOFMS Metabolite Profiling |                 |                      |                                                       |                 |                |                       |                     |
|-------------------------------------|-----------------|----------------------|-------------------------------------------------------|-----------------|----------------|-----------------------|---------------------|
|                                     | <i>m/z</i> (Da) | Retention time (min) | Molecular Formula                                     | Exact Mass (Da) | $\Delta$ (ppm) | CRC Code CAS          | Putative Annotation |
| <i>S. cf. strictum</i> pure culture | 419.1608        | 15.7                 | C <sub>23</sub> H <sub>29</sub> O <sub>5</sub> Cl (6) | 419.1625        | 4.1            | PVV28<br>1114927-89-7 | Acremofuranone A    |
|                                     | 419.1607        | 17.0                 | C <sub>23</sub> H <sub>29</sub> O <sub>5</sub> Cl (6) | 419.1625        | 4.3            | PVV28<br>1114927-89-7 | Acremofuranone A    |
|                                     | 419.1636        | 17.9                 | C <sub>23</sub> H <sub>29</sub> O <sub>5</sub> Cl (6) | 419.1625        | 2.6            | PVV28<br>1114927-89-7 | Acremofuranone A    |

Table S3. Cont.

| NI UHPLC-TOFMS Metabolite Profiling |                      |                                                       |                 |                |                       |                       |
|-------------------------------------|----------------------|-------------------------------------------------------|-----------------|----------------|-----------------------|-----------------------|
| <i>m/z</i> (Da)                     | Retention time (min) | Molecular Formula                                     | Exact Mass (Da) | $\Delta$ (ppm) | CRC Code CAS          | Putative Annotation   |
| 371.2205                            | 18.5                 | C <sub>23</sub> H <sub>32</sub> O <sub>4</sub> (8)    | 371.2222        | 4.6            | HJB61<br>22562-68-1   | Antibiotic LL-Z 1272ε |
| 401.1502                            | 20.4                 | C <sub>23</sub> H <sub>27</sub> O <sub>4</sub> Cl (5) | 401.1520        | 4.5            | PVP88<br>1114927-91-1 | Acremofuranone B      |
| 405.1860                            | 20.6                 | C <sub>23</sub> H <sub>31</sub> O <sub>4</sub> Cl (7) | 405.1833        | 6.7            | HJB60<br>1202381-02-9 | Ilicicolin C          |
| 419.1609                            | 21.3                 | C <sub>23</sub> H <sub>29</sub> O <sub>5</sub> Cl (6) | 419.1625        | 3.8            | PVV28<br>1114927-89-7 | Acremofuranone A      |
| 405.1805                            | 22.3                 | C <sub>23</sub> H <sub>31</sub> O <sub>4</sub> Cl (7) | 405.1833        | 6.9            | HJB60<br>1202381-02-9 | Ilicicolin C          |
| 405.1849                            | 24.3                 | C <sub>23</sub> H <sub>31</sub> O <sub>4</sub> Cl (7) | 405.1833        | 3.9            | HJB60<br>1202381-02-9 | Ilicicolin C          |

## 2. Supplementary Experimental Section

### 2.1. Growth Conditions

For pure cultures, a 5-mm agar plug of a fungal preculture was inoculated in the center of a 9-cm Petri dish containing 30 mL of PDA (potato dextrose agar, Difco, 39 g per liter) prepared with distilled water. The dishes were incubated at room temperature. Co-culture experiments were inoculated with two 5-mm agar plugs of the appropriate fungal strains on opposite sides of a Petri dish containing PDA, and the dishes were incubated at room temperature until physical contact of the two fungi, usually seven days. The strains in the screening of the large set of fungi were incubated at 21 °C [5].

### 2.2. Metabolite Profiling by UHPLC-TOFMS

The analyses were performed on a Micromass-LCT Premier time-of-flight mass spectrometer (Waters, Montreux-Chailly, Switzerland) equipped with an evaporative ionization (ESI) interface coupled to an Acquity UPLC system (Waters, Montreux-Chailly, Switzerland). The *m/z* range was set to 100–1000 in centroid mode with a scan time of 0.25 s and an interscan delay of 0.01 s. The ESI conditions in the PI and NI modes were as follows: capillary voltage of 2800 V, cone voltage of 40 V, source temperature of 120 °C, desolvation temperature of 250 °C, cone-gas flow of 20 L/h, and desolvation gas flow of 600 L/h. For internal calibration, a 2 µg/mL solution of leucine-enkephalin from Sigma-Aldrich (Steinheim, Germany) was infused through the lock-mass probe at a flow rate of 10 µL/min using a second Shimadzu LC-10ADvp LC pump. The metabolite profiling was carried out on an Acquity BEH C18 150 × 2.1 mm 1.7 µm column equipped with a precolumn at a flow rate of 0.45 mL/min. The following solvent system was used. Solvent A, 0.1% formic acid (FA) in water, solvent B, 0.1% FA in acetonitrile, 7' 5%–40% B, 16' 40%–64% B, 1' 64%–100% B, 8' 100% B. The temperature was maintained at 50 °C and the injection volume was 2 µL. Solvents were ULC/MS grade (Biosolve).

### 2.3. Dereplication

For automated dereplication, native MassLynx data from UHPLC-TOFMS analyses were transferred to NetCDF (common data format) using Databridge (Waters, Montreux-Chailly, Switzerland). These files were then imported to MZmine 2 (version 2.10 [6]) for data processing and generation of peak lists. The chromatograms were reduced to 0.5–30 min, and masses were detected in centroid mode with a noise level of 100. Then, peak lists were built with a minimum time span per peak of 0.1 min, a minimum intensity of 1000 and an *m/z* tolerance of 30 ppm. The resulting peak lists were deconvoluted using the algorithm “local minimum search” and deisotoped. All chromatograms were aligned using the function “join aligner” and the combined list was filtered for duplicate peaks. The detailed parameters and the workflow are given in Table S5.

**Table S4.** List of fast-growing fungi co-cultured with *Sarocladium cf. strictum* SIN29 in Petri dishes and visual assessment of the confrontation behavior ([5], overgrowth, contact inhibition, distance inhibition). Fungal growth was inhibited compared to growth as pure culture for all co-cultures with contact or distance inhibition.

| Overgrowth                         | Contact Inhibition                | Distance inhibition                  |
|------------------------------------|-----------------------------------|--------------------------------------|
| <i>F. aff. petroliphilum</i> SIN10 | <i>F. cf. oxysporum</i> SIN1      | <i>F. cf. oxysporum</i> SIN2         |
| <i>F. cf. oxysporum</i> SIN13      | unidentified strain SIN3          | <i>Aspergillus cf. sydowii</i> SIN22 |
| <i>F. cf. oxysporum</i> SIN14      | <i>F. cf. oxysporum</i> SIN5      | <i>Aspergillus</i> sp. SIN31         |
| unidentified strain SIN20          | <i>F. aff. petroliphilum</i> SIN6 |                                      |
| unidentified strain SIN23          | unidentified strain SIN7          |                                      |
| <i>F. cf. dimerium</i> SIN25       | <i>F. cf. oxysporum</i> SIN8      |                                      |
| <i>F. aff. proliferatum</i> SIN26  | <i>F. cf. oxysporum</i> SIN9      |                                      |
| <i>F. aff. proliferatum</i> SIN27  | unidentified strain SIN12         |                                      |
| <i>F. cf. oxysporum</i> SIN46      | <i>F. cf. oxysporum</i> SIN15     |                                      |
| <i>F. cf. oxysporum</i> SIN48      | <i>F. cf. oxysporum</i> SIN16     |                                      |
| <i>F. cf. oxysporum</i> SIN50      | <i>F. cf. oxysporum</i> SIN17     |                                      |
| <i>F. cf. oxysporum</i> MYC51      | <i>F. cf. oxysporum</i> SIN19     |                                      |
| <i>F. aff. solani</i> SIN52        | <i>F. aff. solani</i> SIN54       |                                      |
| <i>F. aff. proliferatum</i> SIN53  |                                   |                                      |
| <i>F. aff. solani</i> SIN56        |                                   |                                      |
| <i>F. cf. oxysporum</i> SIN57      |                                   |                                      |
| <i>F. aff. solani</i> SIN58        |                                   |                                      |
| <i>F. cf. proliferatum</i> SIN59   |                                   |                                      |
| <i>F. cf. oxysporum</i> SIN60      |                                   |                                      |
| <i>F. cf. oxysporum</i> SIN61      |                                   |                                      |
| <i>F. aff. oxysporum</i> SIN62     |                                   |                                      |

**Table S5.** Steps and parameters used during the automatic peak picking procedure by MZmine 2 for dereplication in metabolite profiling chromatograms. The same parameters were used for NI and PI UHPLC-TOFMS data.

| Steps                                                               | Parameters                                                | Value                      |              |
|---------------------------------------------------------------------|-----------------------------------------------------------|----------------------------|--------------|
| (1) Raw data methods → Filtering → Data set filtering               | Filter                                                    | Crop filter                |              |
|                                                                     |                                                           | Retention time (min)       | 0.5 to 30    |
| (2) Raw data methods → Peak detection → Mass detection              | Mass detector                                             | Centroid                   |              |
|                                                                     |                                                           | Noise Level                | 100          |
|                                                                     | MS level                                                  |                            | 1            |
| (3) Raw data methods → Peak detection → Chromatogram builder        | Min time span (min)                                       |                            | 0.1          |
|                                                                     | Min height                                                |                            | 1000         |
|                                                                     | <i>m/z</i> tolerance (ppm)                                |                            | 30           |
| (4) Peak list methods → Peak detection → Chromatogram deconvolution | Algorithm                                                 | Local minimum search       |              |
|                                                                     | Chromatographic threshold (%)                             |                            | 85           |
|                                                                     | Search minimum in RT range (min)                          |                            | 0.1          |
|                                                                     | Minimum relative height (%)                               |                            | 5            |
|                                                                     | Minimum absolute height                                   |                            | 100          |
|                                                                     | Min ratio of peak top/edge                                |                            | 1            |
|                                                                     | Peak duration range (min)                                 |                            | 0 to 10      |
|                                                                     | (5) Peak list methods → Isotopes → Isotopic peaks grouper | <i>m/z</i> tolerance (ppm) |              |
| Retention time tolerance (min)                                      |                                                           |                            | 0.5          |
| Maximum charge                                                      |                                                           |                            | 3            |
| Representative isotope                                              |                                                           |                            | Most intense |
| (6) Peak list methods → Alignment → Join aligner                    | <i>m/z</i> tolerance (ppm)                                |                            | 30           |
|                                                                     | Weight for <i>m/z</i>                                     |                            | 10           |
|                                                                     | Retention time tolerance (min)                            |                            | 0.5          |

Table S5. Cont.

| Steps                                                           | Parameters                               | Value |
|-----------------------------------------------------------------|------------------------------------------|-------|
| (6) Peak list methods → Alignment → Join aligner                | Weight for RT                            | 10    |
|                                                                 | Compare isotope pattern                  |       |
|                                                                 | Isotope $m/z$ tolerance (ppm)            | 30    |
|                                                                 | Minimum absolute intensity               | 100   |
|                                                                 | Minimum score (%)                        | 50    |
| (7) Peak list methods → Filtering → Duplicate peak filter       | $m/z$ tolerance (ppm)                    | 30    |
|                                                                 | RT tolerance                             | 0.5   |
| (8) Peak list methods → Identification → Custom database search | $m/z$ tolerance (ppm)                    | 30    |
|                                                                 | Retention time tolerance (absolute, min) | 0.5   |

The detected masses within the peak lists were identified by a “custom database search” using entries of DNP (version 22:1, CRC Press, Taylor & Francis, Abingdon, UK). For this, entries with the biological source listed as *Fusarium*, *Gibberella* (name of teleomorph form of *Fusarium*) and *Acremonium* (synonym of *Sarocladium*) were exported and two CSV files were constructed that contained the CRC code as unique identifier, the compound name, the molecular formula and  $m/z$  that was calculated from the exact mass (as given in DNP) by addition or subtraction of the proton mass (1.007276 Da) for the identification of compounds analyzed in PI and NI mode, respectively. Within MZmine 2, detected compounds are identified based on their exact mass with an  $m/z$  tolerance of 30 ppm and by comparing isotopic patterns (heuristic filtering [7]) with a score of 50% or higher. The  $m/z$  tolerance and the isotopic pattern match score were chosen large to compensate for  $m/z$  errors due to alignment during data mining. Also, spectra in PI and NI mode were measured in the same chromatographic run and this diminishes the mass accuracy of the TOFMS analysis. In a second step, putatively identified compounds were searched in the original chromatograms with MassLynx (V4.1, Waters) and the molecular formula was verified using the in-built elemental composition tool (exact mass and isotopic pattern match).

#### 2.4. Semi-Preparative HPLC-MS Purification of Induced Compound

The purification was performed on a modular HPLC system composed of a Varian 9012 pump (Palo Alto, CA, USA), a manual injection system (Rheodyne, IDEX Health & Science, Wertheim-Mondfeld Germany), a UV spectrometer set at 254 nm (2151 variable wavelength monitor, LKB Pharmacia, Bromma, Sweden) equipped with a Pharmacia LKB-Rec 1 chart recorder, a fraction collector (FC204, Gilson, Middleton, WI, USA), an adjustable flow splitter, and an MS spectrometer (LCQ, Finnigan MAT, San Jose, CA, USA) with an ESI interface. Separations were performed using water with 0.1% FA as eluent A and acetonitrile with 0.1% FA as eluent B. A fraction (1/170) of the flow was split to the MS detector for analysis. The following ESI conditions were used: capillary temperature, 180 °C; source voltage, 2.5 kV; and sheath gas nitrogen, 70 psi. The MS acquisitions were performed in PI mode using a full scan mode over an  $m/z$  range of 150–1000 and a scan time of 1 s.

#### 2.5. Microflow NMR Analysis of the Isolated Compound

Microflow NMR analyses were performed on a Varian Unity Inova 500 MHz NMR instrument (Palo Alto, CA, USA) equipped with a 5  $\mu$ L microflow NMR probe (CapNMR™) from Protasis/MRM (Savoy, IL, USA) with an active volume of 1.5  $\mu$ L. The samples were dissolved in 10  $\mu$ L of CD<sub>3</sub>OD and injected manually using a microliter 25  $\mu$ L syringe with a 22s gauge needle (Hamilton®). <sup>1</sup>H-NMR analysis was done with 128 transients at 298 K. Spectra were treated using MestReNova (version 8.0.2, Mestrelab Research S. L.) and chemical shifts were referenced to the residual protonated solvent signal (CD<sub>3</sub>OD, 3.31 ppm).

## 2.6. Targeted Detection of Fusaric Acid

For automated and targeted analysis of fusaric acid prevalence in a previously recorded dataset of 229 chromatograms of pure cultures and co-cultures [5], MZmine 2 (version 2.10 [6]) and its “targeted peak detection” function was used. Therefore, the native MassLynx files from UHPLC-TOFMS analyses were transferred to NetCDF using Databridge (Waters) and imported to MZmine 2. Only chromatograms in PI mode were processed to generate peak lists.

The chromatograms were reduced to 0.5–4.5 min, and masses were detected in centroid mode with a noise level of 50. The  $m/z$  value of fusaric acid was calculated using MassLynx molecular weight calculator from molecular formula and the “targeted peak detection” function was applied with an  $m/z$  tolerance of 15 ppm (0.005  $m/z$ ). The resulting peak lists were deconvoluted using the Savitzky-Golay filter with a manually optimized derivative threshold level 90% (with the help of the preview function in MZmine 2) and deisotoped. All chromatograms were aligned using the function “join aligner”, gap filled using the function “same RT and  $m/z$  range gap filler” ( $m/z$  tolerance range 15 ppm) and filtered for duplicate peaks (retention time tolerance 0.15 min). The detailed parameters are given in Supplementary Table S6. The aligned chromatograms were exported to a .csv file and further analyzed in Excel. The graphs were created with SigmaPlot (12.0, Systat Software Inc., San Jose, CA, USA).

**Table S6.** Steps and parameters used during the automatic peak picking procedure by MZmine 2 for targeted analysis of fusaric acid in PI UHPLC-TOFMS fingerprinting analyses.

| Steps                                                                   | Parameters           | Value      |
|-------------------------------------------------------------------------|----------------------|------------|
| (1) Raw data methods → Filtering → Data set filtering                   |                      |            |
| Filter                                                                  | Crop filter          |            |
|                                                                         | Retention time (min) | 0.5 to 4.5 |
| (2) Raw data methods → Peak detection → Targeted peak detection         |                      |            |
| Intensity tolerance (%)                                                 |                      | 50         |
| $m/z$ tolerance (ppm)                                                   |                      | 15         |
| Retention time tolerance (min)                                          |                      | 0.15       |
| (3) Peak list methods → Peak detection → Chromatogram deconvolution     |                      |            |
| Algorithm                                                               | Savitzky-Golay       |            |
| Min peak height                                                         |                      | 50         |
| Peak duration range (min)                                               |                      | 0 to 10    |
| Derivative threshold level (%)                                          |                      | 90         |
| (4) Peak list methods → Alignment → Join aligner                        |                      |            |
| $m/z$ tolerance (ppm)                                                   |                      | 15         |
| Weight for $m/z$                                                        |                      | 10         |
| Retention time tolerance (min)                                          |                      | 0.15       |
| Weight for RT                                                           |                      | 10         |
| (5) Peak list methods → Gap filing → Same RT and $m/z$ range gap filler |                      |            |
| $m/z$ tolerance (ppm)                                                   |                      | 15         |
| (6) Peak list methods → Filtering → Duplicate peak filter               |                      |            |
| $m/z$ tolerance (ppm)                                                   |                      | 15         |
| RT tolerance                                                            |                      | 0.15       |

Original chromatograms with positive detection of fusaric acid were manually processed in MassLynx (V4.1, Waters) and the molecular formula was verified using the in-built elemental composition tool (exact mass and isotopic pattern match). This revealed that features with a peak area of <50,000 were identified as false-positive hits for fusaric acid detection, based on peak shape, accurate mass and isotopic pattern. This peak area value was thus used as detection threshold to assess fusaric acid production (Figures 5, 6 and S2).

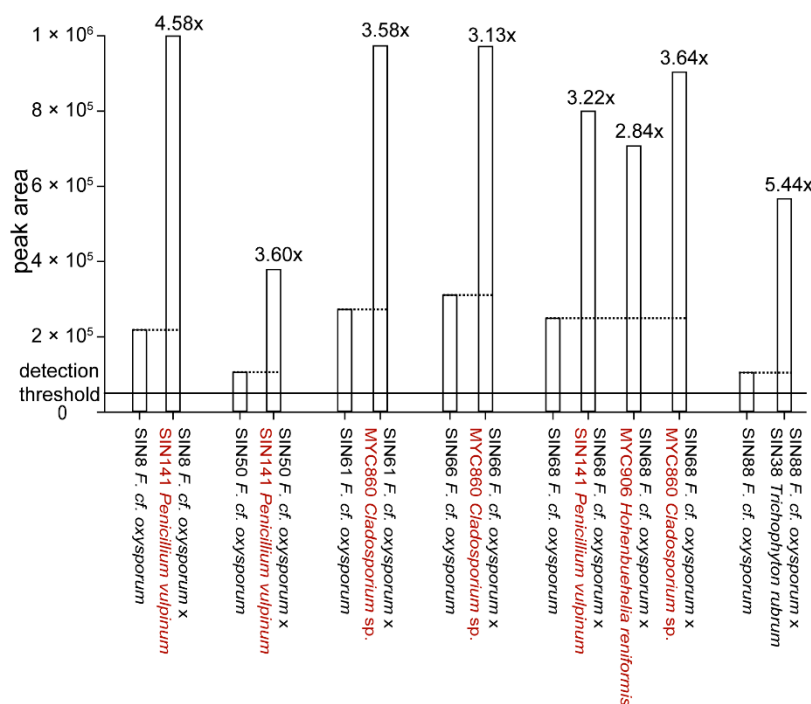

**Figure S2.** Upregulation of fusaric acid upon co-culture. Estimation of fold change variations was calculated based on extracted peak area of fusaric acid for the UHPLC-TOFMS metabolite profiles. Co-cultures with upregulated fusaric acid production are shown in comparison to fusaric acid production in the respective pure culture. Co-cultures where *de novo* induction was observed are shown in Figure 5 in the main text. All strains are of human origin, except SIN141, MYC860 and MYC906 (marked red).

## References

1. Creek, D.J.; Dunn, W.B.; Fiehn, O.; Griffin, J.L.; Hall, R.D.; Lei, Z.; Mistrik, R.; Neumann, S.; Schymanski, E.L.; Sumner, L.W., *et al.* Metabolite identification: are you sure? And how do your peers gauge your confidence? *Metabolomics* **2014**, *10*, 350–353.
2. Zhang, P.; Bao, B.; Dang, H.T.; Hong, J.; Lee, H.J.; Yoo, E.S.; Bae, K.S.; Jung, J.H. Anti-inflammatory sesquiterpenoids from a sponge-derived fungus *Acremonium* sp. *J. Nat. Prod.* **2009**, *72*, 270–275.
3. Gutiérrez, M.; Theoduloz, C.; Rodríguez, J.; Lolas, M.; Schmeda-Hirschmann, G. Bioactive metabolites from the fungus *Nectria galligena*, the main apple canker agent in Chile. *J. Agr. Food Chem.* **2005**, *53*, 7701–7708.
4. Isaka, M.; Yangchum, A.; Supothina, S.; Laksanacharoen, P.; Jennifer Luangsa-ard, J.; Hywel-Jones, N.L. Ascochlorin derivatives from the leafhopper pathogenic fungus *Microcera* sp. BCC 17074. *J. Antibiot.* **2015**, *68*, 47–51.
5. Bertrand, S.; Schumpp, O.; Bohni, N.; Bujard, A.; Azzollini, A.; Monod, M.; Gindro, K.; Wolfender, J.-L. Detection of metabolite induction in fungal co-cultures on solid media by high-throughput differential ultra-high pressure liquid chromatography-time-of-flight mass spectrometry fingerprinting. *J. Chromatogr. A* **2013**, *1292*, 219–228.
6. Pluskal, T.; Castillo, S.; Villar-Briones, A.; Oresic, M. MZmine 2: Modular framework for processing, visualizing, and analyzing mass spectrometry-based molecular profile data. *BMC Bioinf.* **2010**, *11*, 395.
7. Kind, T.; Fiehn, O. Seven golden rules for heuristic filtering of molecular formulas obtained by accurate mass spectrometry. *BMC Bioinf.* **2007**, *8*, 105.
